1                    **Erythropoietin single nucleotide polymorphisms are associated with anemia and**  
2                    **dyslipidemia in a cardiovascular disease population.**

3       Victoria Northrup<sup>1,2,6</sup>, Ashley L. Eadie<sup>1,2,6</sup>, Victoria L. Nelson<sup>1,2,6</sup>, Kenneth D'Souza<sup>1,2,3,6</sup>, Ansar  
4       Hassan<sup>3,6</sup>, Thomas Pulinilkunnil<sup>2,4,6</sup>, Petra Kienesberger<sup>2,4,6</sup>, Jean-Francois Légaré<sup>3,6</sup>, Jeremy A.  
5                    Simpson<sup>5,6</sup>, Keith R. Brunt<sup>1,2,3,6</sup>

6                    <sup>1</sup>Department of Pharmacology, Dalhousie University, Halifax, Nova Scotia, Canada

7                    <sup>2</sup>Dalhousie Medicine New Brunswick, Saint John, New Brunswick, Canada

8                    <sup>3</sup>Departments of Cardiology & Cardiac Surgery, New Brunswick Heart Center,  
9                    Saint John Regional Hospital, Saint John, New Brunswick, Canada

10                  <sup>4</sup>Department of Biochemistry and Molecular Biology, Dalhousie University, Halifax, Nova  
11                    Scotia, Canada

12                  <sup>5</sup>Department of Human Health and Nutritional Sciences, University of Guelph, Guelph, Ontario,  
13                    Canada

14                  <sup>6</sup>IMPART investigator team Canada (<https://impart.team/>)

15  
16                    Corresponding Author:

17                    Dr. Keith R. Brunt

18                    100 Tucker Park Road, Box 5050

19                    Saint John, NB, Canada, E2L 4L5

20                    1-(506)-636-6974

21                    keith.brunt@dal.ca

22                    @prof\_brunt (social media)  
23  
24  
25

26 **Abstract**

27 Human erythropoietin (EPO) is an essential erythropoietic cytokine and recombinant biological  
28 therapeutic in anemia in chronic kidney disease. Single nucleotide polymorphisms (SNPs) in  
29 EPO have been linked to anemia and diabetic microvascular complications but no other  
30 cardiovascular comorbidities like dyslipidemia or hypertension. Here identified a clinical cohort  
31 of cardiovascular patients with anemia, dyslipidemia, hypertension, type-2 diabetes, or heart  
32 failure with preserved ejection fraction. Sanger sequencing was used for genotyping three EPO  
33 SNPs (rs1617640, rs507392 and rs551238), which were compared to clinical outcomes with  
34 SNPstat and clinical parameters profiles by student t-test. Nonstandard clinical chemistry  
35 measures of plasma EPO, hepcidin, transferrin, and ferritin were determined by ELISA. In the  
36 additive model, the C allele of rs1617640 was associated with lower EPO and anemia. In the  
37 recessive model, the SNP rs507392 genotype of GG was associated with dyslipidemia, which  
38 was associated with lower EPO in plasma and elevated total cholesterol and low-density  
39 lipoproteins. Interestingly, the G allele of rs507392 was found to be associated with  
40 hypertension, but only in females. Here we show that the SNPs in EPO are a potential risk factor  
41 for anemia, dyslipidemia, and hypertension in cardiovascular disease patients.

42

43 **Introduction**

44  
45 Cardiovascular disease is one of the leading causes of death worldwide[1] , with multiple  
46 contributing risk factors like anemia, including some linked to erythropoietin (EPO) or the use of  
47 erythropoietic stimulating agents.[2] Heart failure with preserved ejection fraction (HFpEF), is  
48 an especially challenging multimorbid condition featuring anemia, hypertension, type-2 diabetes  
49 mellitus (T2DM), obesity, or chronic kidney disease. The underlying cause of HFpEF and  
50 optimal medical management remains a challenge[1]. Microvascular complications are typically  
51 reported in HFpEF[3], and anemia in heart failure is generally associated with higher  
52 mortality,[4] severity, and hospital admission rates[5,6]. HFpEF is also more common in  
53 females, particularly those who are older, obese, and with a higher New York Heart Association  
54 (NYHA) classification. Microvascular complications in diabetes and anemia have been linked to  
55 EPO but have not previously been investigated in HFpEF or its multimorbid feature  
56 comorbidities.

57 EPO is a master regulator of hematopoiesis and erythropoiesis, with secondary roles in  
58 cytoprotection and cellular metabolism.[7] Research on EPO has been extensive, yet clinical  
59 variation in EPO expression in health and disease and the underlying secondary mechanisms are  
60 poorly understood. A significant source of clinical variation in hormones like EPO can occur  
61 with haplotypes or single nucleotide polymorphisms (SNP). The entire gene of EPO has been  
62 known for decades, yet just three SNP have been identified as clinically relevant  
63 rs1617640(promoter), rs507392(intron) and rs551238(downstream). Genome-wide association  
64 studies (GWAS) and expression quantitative trait loci (eQTL) analysis have previously  
65 established that promoter SNP (rs1617640) is associated with an alteration in serum EPO,[8] a  
66 finding confirmed in healthy blood donors[9]. The promoter SNP (rs1617640) has also been

67 linked to diabetic microvascular complications[10–18], anemia in T2DM[19], and renal  
68 dysfunction after cardiac surgery[20] (Supplemental Table 1). In intron 3, SNP rs507392 was  
69 linked to diabetic microvascular complications [10,12,13,21] and overall higher mortality in  
70 diabetics [9]. SNP rs551238 (downstream of *EPO*) has also been associated with microvascular  
71 complications[9,10,12–15,21,22] and higher hematocrit in healthy blood donors [9]  
72 (Supplemental Table 1). Together, this suggests a potential link between microvascular  
73 complications, hematocrit, and *EPO* SNPs. These *EPO* SNPs have also been associated with  
74 *EPO* serum levels[18]. In CKD, a decrease in *EPO* is associated with anemia[23], whereas in  
75 other forms of anemia, *EPO* can be increased up to 100-fold, suggesting insensitivity in  
76 molecular signaling.[24] Secondary risks to CVD might also be linked to *EPO* independent of  
77 anemia, especially classic risk factors of CVD. For example, dyslipidemia is a salient risk factor  
78 for CVD characterized by abnormal serum cholesterol levels, triglycerides and related  
79 lipoproteins[25]. In mice treated with recombinant *EPO* (rhEPO), triglyceride levels were  
80 decreased[26] and lipoprotein lipase (in lipogenesis) was elevated.[26,27] In humans, treatment  
81 with rhEPO is associated with lower triglyceride levels and cholesterol in end-stage renal  
82 failure.[28]

83         Although anemia, dyslipidemia, T2DM, hypertension are risk factors for CVD and  
84 multimorbid features of HFpEF with evidence of being modifiable by rhEPO—only anemia has  
85 been linked to *EPO* SNPs to date.[19] Here, we hypothesize that three *EPO* SNPs—  
86 rs1617640(promoter), rs507292(intron) and rs551238(downstream)—correlate with *EPO* plasma  
87 concentrations and are associated with either anemia, dyslipidemia, T2DM, hypertension and/or  
88 HFpEF in a clinical population requiring surgical interventions for CVD.

89

## 90 **Methods**

### 91 *Genomic DNA extraction*

92 Genomic DNA (gDNA) was isolated from the buffy coat of blood collected during the  
93 impact of Obesity on Postoperative Outcomes following cardiac Surgery (OPOS) study  
94 (<http://clinicaltrials.gov/study/NCT0324891>). The OPOS cohort consisted of participants aged  
95 18-75 years old who underwent elective cardiac surgery at either the New Brunswick Heart  
96 Center in New Brunswick, Canada or the Maritime Heart Centre in Nova Scotia, Canada.[29]  
97 The OPOS study and related biomarker discovery was approved by the Horizon Health Network  
98 Research Ethics Board (#RS20142006: RS100835). The buffy coat was separated from blood,  
99 and gDNA was isolated using either DNAzol<sup>®</sup> reagent (GibcoBRL cat # 10503-027) or  
100 QIAamp<sup>®</sup> DNA blood mini (Qiagen cat # 51104) kits (following the manufacturer's protocol).  
101 DNA was quantified by spectroscopy on a BioTek Synergy<sup>™</sup> H4 Hybrid Microplate reader  
102 using the 260:280 nm ratio by the Gen5 software (BioTek), and the average concentration of  
103 technical duplicates was used.

### 104 *Primer design*

105 Primers were designed using Oligo 7 software (Table 1).[30] Primers designed for gDNA  
106 sequencing included M13 sequences[31] to facilitate Sanger sequencing and M13 primers were  
107 used in sequencing reactions.

### 108 *Polymerase Chain Reaction*

109 End-point polymerase chain reaction (PCR) was performed on gDNA using AmpliTaq  
110 Gold<sup>™</sup> 360 Master Mix (Applied Biosystems cat # 4398881). PCR reactions consisted of 1 X  
111 AmpliTaq Gold<sup>™</sup> 360 Master Mix, 0.3  $\mu$ M of forward and reverse primers, 4  $\mu$ g of Bovine  
112 Serum Albumin (BSA, Thermo Scientific), 50 ng of gDNA and nuclease-free water up to 15  $\mu$ L.

113 Reactions were amplified on a Mastercycler Nexus Gradient Thermocycler (Eppendorf) using  
114 the cycling conditions listed in Table 2.

115 PCR products were verified using 7500 Agilent DNA Chips (Agilent cat # 5067-1506) on  
116 the Bioanalyzer 2100 system (Agilent). PCR products were cleaned up using 2  $\mu$ L of ExoSAP-  
117 IT<sup>TM</sup> (Applied Biosystems cat # 78200) in 5  $\mu$ L of PCR product and incubating at 37°C for 15  
118 minutes. ExoSAP-IT<sup>TM</sup> was inactivated at 80°C for 15 minutes.

### 119 *Sanger Sequencing*

120 Sequencing reactions were prepared using a BigDye<sup>TM</sup> Terminator v3.1 Cycle  
121 Sequencing Kit (Applied Biosystems cat# 4337457). The cleaned PCR product was added to a  
122 reaction of 1X Sequencing buffer, 1X BigDye<sup>TM</sup> MasterMix, and 2 $\mu$ M primer of M13  
123 sequencing primers.[31] Sequencing reactions were incubated at 96°C for 1 minute and 25 cycles  
124 of 96°C for 10 seconds, 50°C for 5 seconds and 60°C for 4 minutes.

125 BigDye<sup>TM</sup> Xterminator beads (Applied Biosystems cat # 4376486) were added to the  
126 sequencing reaction and vortexed at 2000 rpm for 25 minutes. Samples were centrifuged for 2  
127 minutes at 2000 X rcf and let rest for 2 minutes before centrifuging again at 2000 X rcf for 30  
128 seconds, followed by another 30 seconds of rest to ensure that beads were sedimented. Then,  
129 20 $\mu$ L of the sequencing reaction (without beads) was transferred to a 96-well plate and loaded  
130 onto the 3500 Genetic Analyzer (Applied Biosystems) for sequencing.

### 131 *Sanger Sequencing Analysis*

132 Sequences were analyzed using BioEdit Sequences Alignment Editor software.[32] The  
133 forward and reverse sequences were aligned using the ClustalW Multiple alignment tool to  
134 generate the consensus sequence for each product. Sequences were submitted to NCBI Blast to  
135 validate correct target amplification and were compared to the NCBI reference sequence

136 NG\_021471.2 to identify variants. A variant was defined as any base calling that differed from  
137 the reference sequence.

138 *SNP analysis*

139 SNPStats ([www.snpstats.net](http://www.snpstats.net))[33] was used to determine allele and genotype frequencies,  
140 test for Hardy-Weinberg equilibrium, assess SNP response using logistic regression in multiple  
141 inheritance models (co-dominant, dominant, recessive, over-dominant and log-additive), linkage  
142 disequilibrium statistics, and for haplotype analysis. Analysis used sex, age, and body mass index  
143 (BMI) as co-variants. A p-value < 0.05 was deemed significant.

144 Clinical findings were obtained from the OPOS BioBank (storing retrievable databases of  
145 de-identified data abstracted from patient records). Comparisons of clinical values with genotype  
146 were performed using a student t-test to determine the p-value (<0.05 significant). A  
147 Kolmogorov-Smirnov test in GraphPad was used to confirm normality. A ROUT (Q=1) test in  
148 GraphPad was used to determine outliers; outliers were still presented and identified by  
149 encirclement in figures for clinical relevance but were otherwise excluded from group testing.

150 *Enzyme-linked immunosorbent assays*

151 Plasma samples collected from OPOS [29] were used for enzyme-linked immunosorbent assays  
152 (ELISA) for EPO (Human EPO ELISA kit, Invitrogen Cat # BMS2035-3), Transferrin  
153 (Transferrin Human ELISA Kit, Invitrogen cat # EHTF), Hepcidin (Human Hepcidin Quantikine  
154 ELISA kit, R&D systems cat # DHP350) and Ferritin (Ferritin Human ELISA Kit, Invitrogen cat  
155 # EHFTEL). Plasma samples were diluted 1:2 for EPO, 1: 20,000 for Transferrin, 1:5 for  
156 Hepcidin, and 1:10 for Ferritin using the kit manufacturer's diluent. ELISAs were performed  
157 using the manufacturer's protocol and absorbance was measured at 450 nm using the Synergy  
158 H4 plate reader. GraphPad Prism (Prism9) was used for statistical analysis and graphing data.

159 Two-way ANOVA was used to determine p-values. A p-value of <0.05 was deemed significant.

## 160 **Results**

### 161 *Subcohort of patients with multimorbid conditions at elevated risk of CVD*

162 The OPOS sub-cohort analyzed herein consisted of 95 participants recruited for the  
163 OPOS study (358 participants). Participants with at least one condition: anemia, dyslipidemia,  
164 hypertension, T2DM and/or diagnosed HFpEF, were sampled as a sub-cohort. The demographics  
165 and clinical parameters of the OPOS cohort are shown in Table 3 and Supplemental Table 2.  
166 Some multimorbid parameters overlap between controls and the cases in each condition but  
167 otherwise served provided sex and age matched controls with CVD but without the specified  
168 outcome. Among these cases, dyslipidemia were associated with a higher NYHA score. BMI was  
169 higher in patients with T2DM and anemia but lower in those with HFpEF. Males were more  
170 prevalent in T2DM, hypertension, and dyslipidemia sub-populations. In contrast, females were  
171 more prevalent in anemia (taking into consideration the sex-dependent normal ranges used for  
172 males/females of the study population). Overall, this subcohort represents patients with salient  
173 risk factors requiring an intervention by cardiac surgery.

174

### 175 *Reassurance of experimental approach for avoiding SNP linkage disequilibrium*

176 SNPs rs1617640(promoter), rs507392(intron) and rs551238(downstream) are located  
177 within 4.2 kb of one another. Due to this proximity, linkage disequilibrium is likely to occur[34].  
178 Here, we performed a linkage disequilibrium analysis using SNPstats and found a high degree of  
179 linkage disequilibrium between our three SNPs (Supplemental Figure 1a). The highest degree of  
180 linkage disequilibrium was measured between rs1617640(promoter) and rs507392(intron),  
181 followed by rs507392(intron) and rs551238(downstream). SNPs rs1617640(promoter) and



182 rs551238(downstream) were observed to have the least degree of disequilibrium. These  
183 associations correlated with the SNPs' positions along the *EPO* gene, with those closest in  
184 proximity (Supplemental Figure 1b) showing the highest degree of disequilibrium.

185

### 186 ***The presence of the C allele in rs1617640(promoter) increases the risk of anemia***

187 Each SNP was examined for association based on dominant, recessive, or additive  
188 inheritance models (Table 4). The C allele of rs1617640 SNP in the promoter region was  
189 associated with anemia in an additive inheritance model with an odds ratio (OR) of 1.96 (p-value  
190 0.04). Whether clinical parameters correlated with specific genotypes was then investigated. In  
191 SNP rs1617640, there were significant differences between genotypes in hemoglobin, neutrophil  
192 to lymphocyte ratios (NLR), cholesterol, low-density lipoprotein (LDL), and non-high-density  
193 lipoprotein (non-HDL) (Supplemental Table 3, Supplemental Figure 2). The lower hemoglobin  
194 levels in the CC genotype support the association of anemia with the C allele, with the higher  
195 NLR suggesting elevated inflammation. The rs1617640(promoter) CC genotype was associated  
196 with a lower plasma EPO level, although iron bioavailability (as measured by Ferritin, Hpcidin  
197 and Transferrin) was not significantly different (Figure 1). These findings suggest that SNP  
198 rs1617640(promoter) is likely affecting EPO directly, not through iron bioavailability.

199

### 200 ***GG Genotype of rs507392(intron) is protective against dyslipidemia***

201 To characterize the role of the GG Genotype of intron SNP (rs507392) we examined the  
202 OR-value for anemia, dyslipidemia, and hypertension. The GG genotype of rs507392 was  
203 associated with protection against dyslipidemia in a recessive model (OR value = 0.29; p-value =  
204 0.048) (Table 4), while there was no significance with anemia or hypertension. Variations based

205 on genotype in rs507392(intron) were seen in clinical parameters including cholesterol, LDL,  
206 non-HDL, and NLR (Supplemental Table 4, Supplemental Figure 3). This suggests that SNP  
207 rs507392(intron) is associated with lipid handling/regulation. As with rs1617640(promoter), the  
208 GG genotype in rs507392(intron) demonstrated lower levels of EPO in the plasma (Figure 1).  
209 There was no association to risk factors for SNP rs551238(downstream) (Table 4), and fewer  
210 significant differences in clinical parameters were observed (Supplemental Table 5 and  
211 Supplemental Figure 4). Unlike rs1617640(promoter) and rs507392(intron), no significant EPO  
212 changes in rs551238(downstream) were observed (Figure 1).

213

#### 214 ***No strong evidence for EPO haplotype association with risk factors***

215 Haplotype was also examined to determine the cumulative effects of all three SNPs to  
216 clinical outcomes. The predominant haplotypes of AAT and CGG did not correlate with any  
217 clinical phenotype. However, one of the rare haplotypes of CGT (which occurred in  
218 approximately 3% of our cohort) did correlate with dyslipidemia. The OR-value of 0.05 suggests  
219 that the CGT haplotype is protective against dyslipidemia but should be interpreted with caution  
220 given the low prevalence (Table 5, Supplemental Table 6).

221

#### 222 ***Sex differences are apparent with SNP associations to risk factors***

223 Precision medicine necessitates accounting for sex differences, and here we find  
224 meaningful sex effects to the associated risk factors. In males, the prevalence of dyslipidemia,  
225 T2DM, and hypertension are significantly higher than that observed in females[35], whereas in  
226 females, the prevalence of anemia[36] and HFpEF[37] is significantly higher. Given these sex  
227 differences in the clinical phenotypes examined herein, we analyzed the differences in SNPs

228 within each sex to determine if sex differences would affect our results. SNP rs507392(intron)  
229 AG and GG genotypes, and rs551238(downstream) TG genotype, were associated with  
230 hypertension in females, but not in males (Table 6, Supplemental Table 7), suggesting that the  
231 rs507392(intron) and rs551238(downstream) SNPs could be risk factors for hypertension in  
232 females but not males.

233

#### 234 ***New EPO variants of potential concern identified***

235 During the analysis of *a priori* sequences obtained for rs1617640(promoter),  
236 rs507392(intron), and rs551238(downstream), other variants were also identified (Supplemental  
237 Table 8). Many of these variants were only detected in a single individual as a heterozygote;  
238 others were identified in a several individuals, with most being heterozygotes. However, most of  
239 these variants have not previously been reported and are, therefore, of unknown significance.  
240 Three variants were found in a significant subset of our population, including a four-base pair  
241 deletion (2167?-2170?del). This variant is located within a repeat region in intron 3, and thus the  
242 breakpoint may be inexact. This base pair deletion was found to be homozygous in 76 cases and  
243 suspected to be heterozygous in 4 cases. The 3154T>G substitution was found in 83 individuals,  
244 with 77 of these determined as homozygotes. Lastly, 3806T>C was found in 33 individuals, with  
245 31 of these determined as heterozygotes. This data suggests more variation in EPO than  
246 previously reported, which needs further exploration in larger study populations where further  
247 associations can be uncovered.

248

249 **Discussion**

250 Here, we identified linkage between the three *EPO* SNPs and cardiovascular disease risk  
251 factors, including dyslipidemia and HFpEF-associated comorbidities: anemia, T2DM, and  
252 hypertension. The CC genotype of rs1617640(promoter) and GG genotype of rs507392(intron)  
253 were associated with lower EPO plasma levels and correlated with comparably higher  
254 cholesterol, LDL, and non-HDL lipoproteins. The promoter-SNP (rs1617640) CC was associated  
255 with lower Hb and anemia in a log additive model and has been previously linked to anemia in  
256 T2DM[19]. While the role of the promoter-SNP in CVD has been explored to a lesser extent, our  
257 data support it as being linked to anemia in CVD. Surprisingly, the intron-SNP (rs507392) GG  
258 genotype had a protective association with dyslipidemia in a recessive model. There was no  
259 significant association between hypertension and the SNPs in the overall population, although  
260 rs507392(intron) and rs551238(downstream) were associated with hypertension in females,  
261 suggesting a sex dependence. Our study highlights that EPO variants are associated with  
262 comorbid conditions that present significant cardiovascular risk factors of anemia, dyslipidemia,  
263 and hypertension for the first time.

264 EPO levels are well known to be associated with anemia[23,24], so any SNP that alters  
265 plasma EPO levels, such as rs1617640(promoter) and rs507392(intron), as we have shown, could  
266 be risk factors for anemia, and require additional pharmacogenetic guided intervention. Yet, iron  
267 bioavailability also contributes to two of the most common forms, iron-deficiency anemia and  
268 anemia of inflammation (or anemia of chronic disease, e.g., CVD)[38]. The  
269 rs1617640(promoter) C-allele associated with anemia was also associated with NLR, indicative  
270 of active inflammatory processes[39,40]. This suggests the C allele for rs1617640(promoter) is  
271 associated with inflammation and decreased Hb. It has been purported that EPO can exert an

272 indirect anti-oxidant effect by utilizing iron in erythrocytosis resulting in less bioavailable  
273 iron.[41] Patients with anemia of inflammation commonly have reduced serum iron and normal  
274 to elevated iron stores.[42] In blood, iron is transported by transferrin[43] and can be stored in  
275 ferritin within most cells, like macrophages and hepatocytes.[44] The release of recycled iron  
276 from intracellular stores is partially regulated by hepcidin—a hormone that inhibits the  
277 transportation of intracellular iron to the blood and is induced by inflammation.[38] Hypoxia-  
278 inducible factors (HIFs; which upregulate *EPO*[7]) also reduce hepcidin, thus increasing  
279 transferrin, ferritin, and iron bioavailability.[45] We measured hepcidin, transferrin and ferritin to  
280 examine whether the *EPO* SNPs altered iron bioavailability. Still, despite elevated NLR  
281 associated with allelic frequency, we did not find significant differences between genotypes. This  
282 leads us to conclude that the SNPs in *EPO* are likely not exerting their effects by regulating iron  
283 bioavailability.

284         Ours is the first study to identify *EPO* SNPs associated with dyslipidemia and/or  
285 lipoproteins in medically managed patients. Prior studies have reported that rhEPO therapy  
286 modulates triglycerides, cholesterol, and other lipoproteins [26–28]. In a mouse model of CKD,  
287 treatment with rhEPO resulted in decreased triglycerides, cholesterol and LDL, but not HDL[26].  
288 In the present study, the GG genotype of rs507392(intron) correlated with lower EPO  
289 concentrations but increased cholesterol, LDL and non-HDL. These variations would also be  
290 expected with diagnosed dyslipidemia, yet the GG genotype was associated with resistance to  
291 dyslipidemia. This apparent contradiction is, however, more likely a consequence of medical  
292 management of dyslipidemia (e.g., statins) to lower lipoprotein levels[46], not the association to  
293 the clinical outcome. Future studies could be designed to validate this epidemiologically with  
294 sufficient covariant adjustments. While rs1617640(promoter) and rs551238(downstream) did not

295 associate with dyslipidemia as an outcome, there was significant variation in cholesterol, with  
296 the rs1617640(promoter)AC variant genotype being significantly lower for LDL and non-HDL  
297 lipoproteins. The rs551238(downstream) TG variant was significantly associated with lower  
298 cholesterol and non-HDL. The CGT haplotype was found to be protective against dyslipidemia,  
299 but this was a rare finding (less than 3% of cohort) and should be interpreted with caution.  
300 Together, these results show that *EPO* SNPs influence lipid metabolism and that  
301 rs507392(intron) is associated with dyslipidemia. The fundamental biology and molecular  
302 biology of *EPO* in these processes need to be explored further.

303 Many clinical phenotypes, including those examined here, have sex differences  
304 attributable to prevalence, response to treatment, or clinical outcomes. Hypertension did not  
305 show an association with the SNPs with the sexes combined, yet the presence of the G allele in  
306 rs507392(intron) and the TG genotype in rs551238(downstream) showed an elevated risk in  
307 females but not males. Hypertension is more prevalent in males[35], and our cohort contained  
308 more males than females, which might explain why this association was initially masked. The  
309 relationship between estrogen and the renin-angiotensin-aldosterone system (RAAS) is thought  
310 to be one of the main reasons for the sex differences observed in hypertension. The RAAS has  
311 also been found to be modulated by *EPO*: in Wistar rats, rh*EPO* increases renin[47] and in  
312 isolated rat kidneys, rh*EPO* promotes angiotensin II (AngII) production.[48] In the oviduct and  
313 endometrium, estrogen ( $17\beta$  (E<sub>2</sub>)) can also promote the expression of *EPO*.[49,50] Given the  
314 relationship between *EPO* and the RAAS system by estrogen, this could be a potential  
315 mechanism for why the G allele of rs507392 and TG genotype of rs551238 are risk factors for  
316 hypertension just in females. Although this finding does require validation in a larger cohort  
317 (including more females with a direct assessment of sex hormones), this may be a significant

318 finding since hypertension tends to be a more salient risk factor for CVD in females.[51]

319 Our results suggest that *EPO* SNPs may be associated with risk factors and co-  
320 morbidities of CVD by affecting the amount of EPO produced. Given the ability to modulate the  
321 amount of EPO either directly through rhEPO or indirectly by targeting upstream of EPO using  
322 hypoxia-inducible factor prolyl-hydroxylase inhibitors, these SNPs could be used to inform the  
323 best course of medical management. Hypoxia-inducible factor (HIF) prolyl-hydroxylase  
324 inhibitors increase EPO by stabilizing the HIFs that transcriptionally act upon *EPO* DNA under  
325 normoxic conditions.[52,53] Though not yet established, should *EPO* SNP result in less HIF  
326 binding to *EPO* in transcriptional regulation or stability of the intronic stores of EPO mRNA[54],  
327 then the use of HIF prolyl-hydroxylase inhibitors may be less potent for directly increasing EPO  
328 compared to rhEPO. Although more work is needed before these SNPs are applied clinically,  
329 they could guide pharmacogenetic interventions that seek to increase EPO or address anemia in  
330 the future or reclassify existing clinical trial data for subgroup analyses. In addition to the  
331 principally known SNPs, we also identified novel variants. Most occurred as heterozygotes in a  
332 single individual, but four occurred in multiple individuals and are potential polymorphisms. In  
333 clinical care, sequencing is more commonplace because of the integration of next-generation  
334 sequencing technologies into standard care. In other disorders, this led to increased variant  
335 detection.[55] Surprisingly, *EPO* has long been overlooked on many gene arrays or panels,  
336 which may account for the low prevalence of *EPO* variants in the literature. As the sequencing  
337 of *EPO* increases, we anticipate further variants of concern can be detected, with a potential for  
338 linkages in large epidemiology studies now that we have discovered them.

339 Our study is not without limitations. One was the small sample size and depth of patient  
340 file analyses, which did not allow us to account for many covariates (such as ethnicity, other

341 comorbidities, or medical management) that could affect our results. Our study did identify  
342 dyslipidemia as a novel disorder and can direct further focused sequencing toward cases of  
343 dyslipidemia and potentially investigate use/efficacy of statins as a covariant. Additionally,  
344 hypertension was identified in females but not males, with the rs507392 G allele and rs551238  
345 TG genotype being risk factors. As we had relatively few females, more sequencing should target  
346 females with hypertension. Even with our sample size, we have identified variables that can  
347 benefit epidemiological or database studies to validate clinical relevance, screening risk or  
348 precision medical management.

349 Here, we have established that *EPO* SNP rs1617640 C-allele was associated with anemia,  
350 as well as changes in lipid metabolism and inflammation. We show the association of GG  
351 genotype for rs507392 to dyslipidemia for the first time. This genotype indicates effects on lipid  
352 profiles despite standard care. In females only, we show that the rs507392 and rs551238 *EPO*  
353 SNPs are associated with hypertension. Together, our results suggest that SNPs in *EPO* are  
354 involved in Hb regulation, lipid metabolism, and inflammation with a female-specific effect on  
355 blood pressure.

356

### 357 **Acknowledgements**

358 Blood samples for gDNA and clinical data were obtained from the IMPART BioBank  
359 (<https://impart.team/biobank/>). Clinical data and samples were retrieved by IMPART BioBank  
360 staff, including Dr. Christie Aguiar, Angella Mercer, and Saumil Shah, in collaboration with the  
361 authors who extend their appreciation. The IMPART BioBank was supported by endowed funds  
362 from the Dalhousie Medical Research Foundation and specialized equipment provided by Saint  
363 John Regional Hospital Foundation-directed donation. This study was supported by the Natural



364 Sciences and Engineering Research Council (NSERC) [discovery grant #RGPIN-2018-05626  
365 and # RGPIN-(2020)-04878] (JAS & KRB), Heart & Stroke Foundation of New Brunswick and  
366 the generosity of the Chesley Family Grant (KRB). VN was supported by the NSERC Alexander  
367 Graham Bell Canada Graduate Scholarship-Doctoral (CGS-D) and the New Brunswick Health  
368 Research Foundation Beatrice Hunter Cancer Research Training Program Award.

### 369 **Authorship Contributions**

370 Conceived; designed experimental approaches of the study (VN, JAS, KRB); Mentored trainee  
371 acquisition of data and execution of the study (JAS & KRB); Collected and assembled data for  
372 the study (VN, ALE, VLN, KD, AH, TP, PK, JFL, & KRB); Analyzed; interpreted & reported  
373 data (VN, AE, VLN, & KRB); Drafted manuscript (VN & KRB); critically reviewed, revised and  
374 edited manuscript for intellectual content and approved final work (VN, ALE, VLN, KD, JFL,  
375 JAS, & KRB).

### 376 **Disclosure of Conflict of Interest**

377 At the time of study and reporting, KRB declares equity holdings in Fibrogen Inc. and serves as  
378 director and majority shareholder in NBBM Inc.

379

380

381 **References**

- 382 1 Savarese G, Lund LH. Global Public Health Burden of Heart Failure. *Card Fail Rev*  
383 2017;**03**:7. doi:10.15420/CFR.2016:25:2
- 384 2 Jean-Baptiste W, Yusuf Ali A, Inyang B, *et al.* Are There Any Cardioprotective Effects or  
385 Safety Concerns of Erythropoietin in Patients With Myocardial Infarction? A Systematic  
386 Review. *Cureus* 2022;**14**. doi:10.7759/CUREUS.25671
- 387 3 Bilak JM, Alam U, Miller CA, *et al.* Microvascular Dysfunction in Heart Failure with  
388 Preserved Ejection Fraction: Pathophysiology, Assessment, Prevalence and Prognosis.  
389 *Card Fail Rev* 2022;**8**. doi:10.15420/CFR.2022.12
- 390 4 Ezekowitz JA, McAlister FA, Armstrong PW. Anemia is common in heart failure and is  
391 associated with poor outcomes: insights from a cohort of 12 065 patients with new-onset  
392 heart failure. *Circulation* 2003;**107**:223–5. doi:10.1161/01.CIR.0000052622.51963.FC
- 393 5 Silverberg DS, Wexler D, Blum M, *et al.* The cardio renal anemia syndrome: correcting  
394 anemia in patients with resistant congestive heart failure can improve both cardiac and  
395 renal function and reduce hospitalizations. *Clin Nephrol* 2003;**60 Suppl 1**:S93-102.
- 396 6 Caramelo C, Justo S, Gil P. Anemia in Heart Failure: Pathophysiology, Pathogenesis,  
397 Treatment, and Incognitae. *Rev Española Cardiol (English Ed)* 2007;**60**:848–60.  
398 doi:10.1016/S1885-5857(08)60029-8
- 399 7 Bunn HF. Erythropoietin. *Cold Spring Harb Perspect Med* 2013;**3**:a011619.  
400 doi:10.1101/cshperspect.a011619
- 401 8 Harlow CE, Gandawijaya J, Bamford RA, *et al.* Identification and single-base gene-  
402 editing functional validation of a cis-EPO variant as a genetic predictor for EPO-

- 403 increasing therapies Graphical abstract Authors. Published Online First: 2022.  
404 doi:10.1016/j.ajhg.2022.08.004
- 405 9 Khabour OF, Bani-Ahmad MA, Hammash NM. Association between polymorphisms in  
406 erythropoietin gene and upper limit haematocrit levels among regular blood donors.  
407 *Transfus Clin Biol* 2012;**19**:353–7. doi:10.1016/J.TRACLI.2012.10.001
- 408 10 Abhary S, Burdon KP, Casson RJ, *et al.* Association between erythropoietin gene  
409 polymorphisms and diabetic retinopathy. *Arch Ophthalmol* 2010;**128**:102–6.  
410 doi:10.1001/archophthalmol.2009.355
- 411 11 Alwohhaib M, Alwaheeb S, Alyatama N, *et al.* Single nucleotide polymorphisms at  
412 erythropoietin, superoxide dismutase 1, splicing factor, arginine/serin-rich 15 and  
413 plasmacytoma variant translocation genes association with diabetic nephropathy. *Saudi J*  
414 *Kidney Dis Transpl* 2014;**25**:577–81. doi:10.4103/1319-2442.132190
- 415 12 Fan YF, Fu YY, Chen Z, *et al.* Gene–gene interaction of erythropoietin gene  
416 polymorphisms and diabetic retinopathy in Chinese Han. *Exp Biol Med* 2016;**241**:1524–  
417 30. doi:10.1177/1535370216645210
- 418 13 Kaur N, Singh IR, Vanita V. Association of Erythropoietin Gene Polymorphisms With  
419 Type 2 Diabetic Retinopathy in Adult Patients From Northern India. *Can J Diabetes*  
420 2021;**45**:785–91. doi:10.1016/j.jcjd.2021.03.008
- 421 14 Li H, Xu H, Li Y, *et al.* Associations between erythropoietin polymorphisms and risk of  
422 diabetic microvascular complications. *Oncotarget* 2017;**8**:112675–84.  
423 doi:10.18632/oncotarget.22699
- 424 15 Liu C, Bai GL, Liu P, *et al.* Role of EPO and TCF7L2 Gene Polymorphism Contribution  
425 to the Occurrence of Diabetic Retinopathy. *Dis Markers* 2022;**2022**:6900660.

- 426 doi:10.1155/2022/6900660
- 427 16 Mankoč Ramuš S, Pungeršek G, Petrovič MG, *et al.* The GG genotype of erythropoietin  
428 rs1617640 polymorphism affects the risk of proliferative diabetic retinopathy in Slovenian  
429 subjects with type 2 diabetes mellitus: enemy or ally? *Acta Ophthalmol* 2021;**99**:e1382–9.  
430 doi:10.1111/AOS.14813
- 431 17 Sesti LFC, Sbruzzi RC, Polina ER, *et al.* Association of polymorphisms in the  
432 erythropoietin gene with diabetic retinopathy: a case–control study and systematic review  
433 with meta-analysis. *BMC Ophthalmol* 2022;**22**:250. doi:10.1186/S12886-022-02467-Y
- 434 18 Tong Z, Yang Z, Patel S, *et al.* Promoter polymorphism of the erythropoietin gene in  
435 severe diabetic eye and kidney complications. *Proc Natl Acad Sci U S A* 2008;**105**:6998–  
436 7003. doi:10.1073/pnas.0800454105
- 437 19 Chiou TTY, Lee JJ, Wang MC, *et al.* Genetic disposition and modifiable factors  
438 independently associated with anemia in patients with type 2 diabetes mellitus. *Diabetes*  
439 *Res Clin Pract* 2015;**108**:164–9. doi:10.1016/j.diabres.2014.12.012
- 440 20 Popov AF, Schulz EG, Schmitto JD, *et al.* Relation between renal dysfunction requiring  
441 renal replacement therapy and promoter polymorphism of the erythropoietin gene in  
442 cardiac surgery. *Artif Organs* 2010;**34**:961–8. doi:10.1111/j.1525-1594.2010.01108.x
- 443 21 Song Q, Zhang Y, Wu Y, *et al.* Association of erythropoietin gene polymorphisms with  
444 retinopathy in a Chinese cohort with type 2 diabetes mellitus. *Clin Exp Ophthalmol*  
445 2015;**43**:544–9. doi:10.1111/ceo.12505
- 446 22 Sobrin L, Green T, Sim X, *et al.* Candidate gene association study for diabetic retinopathy  
447 in persons with type 2 diabetes: The candidate gene association resource (CARE). *Investig*  
448 *Ophthalmol Vis Sci* 2011;**52**:7593–602. doi:10.1167/IOVS.11-7510/-

- 449 /DCSUPPLEMENTAL
- 450 23 Portolés J, Martín L, Broseta JJ, *et al.* Anemia in Chronic Kidney Disease: From  
451 Pathophysiology and Current Treatments, to Future Agents. *Front Med* 2021;**8**:642296.  
452 doi:10.3389/FMED.2021.642296/BIBTEX
- 453 24 Anagnostou A, Lee ES, Kessimian N, *et al.* Erythropoietin has a mitogenic and positive  
454 chemotactic effect on endothelial cells. *Proc Natl Acad Sci* 1990;**87**:5978–82.  
455 doi:10.1073/PNAS.87.15.5978
- 456 25 Berberich AJ, Hegele RA. A Modern Approach to Dyslipidemia. *Endocr Rev*  
457 2022;**43**:611–53. doi:10.1210/endrev/bnab037
- 458 26 Li J, Yang M, Yu Z, *et al.* Kidney-secreted erythropoietin lowers lipidemia via activating  
459 JAK2-STAT5 signaling in adipose tissue. *EBioMedicine* 2019;**50**:317.  
460 doi:10.1016/J.EBIOM.2019.11.007
- 461 27 Penna F, Busquets S, Toledo M, *et al.* Erythropoietin administration partially prevents  
462 adipose tissue loss in experimental cancer cachexia models. *J Lipid Res* 2013;**54**:3045.  
463 doi:10.1194/JLR.M038406
- 464 28 Pollock CA, Wyndham R, Collett P V., *et al.* Effects of erythropoietin therapy on the lipid  
465 profile in end-stage renal failure. *Kidney Int* 1994;**45**:897–902. doi:10.1038/KI.1994.118
- 466 29 Aguiar C, Macleod J, Yip A, *et al.* Impact of Obesity on Postoperative Outcomes  
467 following cardiac Surgery (The OPOS study): Rationale and design of an investigator-  
468 initiated prospective study. *BMJ Open* 2019;**9**:e023418. doi:10.1136/bmjopen-2018-  
469 023418
- 470 30 Rychlik W. *OLIGO 7 Primer Analysis Software*. Humana Press 2007. doi:10.1007/978-1-  
471 59745-528-2\_2/FIGURES/2\_14\_978-1-59745-528-2

- 472 31 Andersson B, Lu J, Edwards KE, *et al.* Method for 96-Well M13 DNA Template  
473 Preparations for Large-Scale Sequencing. *Biotechniques* 1996;**20**:1022–7.  
474 doi:10.2144/96206ST03
- 475 32 Hall T. BioEdit: a user-friendly biological sequence alignment editor and analysis  
476 program for Windows 95/98/NT. *Nucleic Acids Symp Ser* 1999;**41**:95–8.
- 477 33 Solé X, Guinó E, Valls J, *et al.* SNPStats: a web tool for the analysis of association  
478 studies. *Bioinformatics* 2006;**22**:1928–9. doi:10.1093/BIOINFORMATICS/BTL268
- 479 34 Reich DE, Cargill M, Bolk S, *et al.* Linkage disequilibrium in the human genome. *Nature*  
480 2001;**411**:199–204. doi:10.1038/35075590
- 481 35 Peters SAE, Muntner P, Woodward M. Sex Differences in the Prevalence of, and Trends  
482 in, Cardiovascular Risk Factors, Treatment, and Control in the United States, 2001 to  
483 2016. *Circulation* 2019;**139**:1025–35. doi:10.1161/CIRCULATIONAHA.118.035550
- 484 36 Lionel AC, Waters R, Sholzberg M, *et al.* Sex Differences in Anemia and Red Blood Cell  
485 Transfusions Among General Internal Medicine Inpatients. *Blood* 2021;**138**:1074–1074.  
486 doi:10.1182/BLOOD-2021-154106
- 487 37 Sotomi Y, Hikoso S, Nakatani D, *et al.* Sex differences in heart failure with preserved  
488 ejection fraction. *J Am Heart Assoc* 2021;**10**:1–20. doi:10.1161/JAHA.120.018574
- 489 38 Lanser L, Fuchs D, Kurz K, *et al.* Physiology and Inflammation Driven Pathophysiology  
490 of Iron Homeostasis-Mechanistic Insights into Anemia of Inflammation and Its Treatment.  
491 *Nutrients* 2021;**13**:3732. doi:10.3390/NU13113732
- 492 39 Zahorec R. Neutrophil-to-lymphocyte ratio, past, present and future perspectives.  
493 *Bratislava Med J* 2021;**122**:474–88. doi:10.4149/BLL\_2021\_078
- 494 40 Gawdat K, Legere S, Wong C, *et al.* Changes in Circulating Monocyte Subsets (CD16

- 495 Expression) and Neutrophil-to-Lymphocyte Ratio Observed in Patients Undergoing  
496 Cardiac Surgery. *Front Cardiovasc Med* 2017;**4**:12. doi:10.3389/fcvm.2017.00012
- 497 41 Katavetin P, Tungsanga K, Eiam-Ong S, *et al.* Antioxidative effects of erythropoietin.  
498 *Kidney Int Suppl* 2007;**72**. doi:10.1038/SJ.KI.5002482
- 499 42 Weiss G, Goodnough LT. Anemia of chronic disease. *N Engl J Med* 2005;**352**:1011–23.  
500 doi:10.1056/NEJMRA041809
- 501 43 Bomford AB, Munro HN. Transferrin and its receptor: their roles in cell function.  
502 *Hepatology* 1985;**5**:870–5. doi:10.1002/HEP.1840050528
- 503 44 Nairz M, Theurl I, Swirski FK, *et al.* “Pumping iron”—how macrophages handle iron at  
504 the systemic, microenvironmental, and cellular levels. *Pflugers Arch* 2017;**469**:397–418.  
505 doi:10.1007/S00424-017-1944-8
- 506 45 Peyssonnaud C, Nizet V, Johnson RS. Role of the hypoxia inducible factors in iron  
507 metabolism. *Cell Cycle* 2008;**7**:28–32. doi:10.4161/CC.7.1.5145
- 508 46 Zodda D, Giammona R, Schifilliti S. Treatment Strategy for Dyslipidemia in  
509 Cardiovascular Disease Prevention: Focus on Old and New Drugs. *Pharm 2018, Vol 6*,  
510 *Page 10* 2018;**6**:10. doi:10.3390/PHARMACY6010010
- 511 47 Eggena P, Willsey P, Jamgotchian N, *et al.* Influence of recombinant human  
512 erythropoietin on blood pressure and tissue renin-angiotensin systems. *Am J Physiol*  
513 1991;**261**:E642–6. doi:10.1152/AJPENDO.1991.261.5.E642
- 514 48 Brier ME, Bunke CM, Lathon P V., *et al.* Erythropoietin-induced antinatriuresis mediated  
515 by angiotensin II in perfused kidneys. *J Am Soc Nephrol* 1993;**3**:1583–90.  
516 doi:10.1681/ASN.V391583
- 517 49 Masuda S, Kobayashi T, Chikuma M, *et al.* The oviduct produces erythropoietin in an

518 estrogen- and oxygen-dependent manner. *Am J Physiol - Endocrinol Metab*  
519 2000;**278**:E1038–44.  
520 doi:10.1152/AJPENDO.2000.278.6.E1038/ASSET/IMAGES/LARGE/AEND10610007X.  
521 JPEG

522 50 Peng B, Kong G, Yang C, *et al.* Erythropoietin and its derivatives: from tissue protection  
523 to immune regulation. *Cell Death Dis* 2020;**11**. doi:10.1038/S41419-020-2276-8

524 51 Colafella KMM, Denton KM. Sex-specific differences in hypertension and associated  
525 cardiovascular disease. *Nat Rev Nephrol* 2018 *143* 2018;**14**:185–201.  
526 doi:10.1038/nrneph.2017.189

527 52 Johrapurkar AA, Pandya VB, Patel VJ, *et al.* Prolyl Hydroxylase Inhibitors: A  
528 Breakthrough in the Therapy of Anemia Associated with Chronic Diseases. *J. Med. Chem.*  
529 2018;**61**:6964–82. doi:10.1021/acs.jmedchem.7b01686

530 53 Sakashita M, Tanaka T, Nangaku M. Hypoxia-Inducible Factor-Prolyl Hydroxylase  
531 Domain Inhibitors to Treat Anemia in Chronic Kidney Disease. In: *Contributions to*  
532 *Nephrology*. S. Karger AG 2019. 112–23. doi:10.1159/000496531

533 54 Northrup V, Perez LJ, Edgett BA, *et al.* Intron retention is a mechanism of erythropoietin  
534 regulation in brain cell models. *Gene* 2024;**898**:148099. doi:10.1016/j.gene.2023.148099

535 55 Northrup V, Maybank A, Carson N, *et al.* The Value of Next-Generation Sequencing in  
536 the Screening and Evaluation of Hematologic Neoplasms in Clinical Practice. *Am J Clin*  
537 *Pathol* 2020;**153**:639–45. doi:10.1093/AJCP/AQZ203

538  
539  
540



541 **Tables**

542 **Table 1 - Primers**

| <b>Target</b>  | <b>Primer Name</b> | <b>Sequence 5'→3'</b>                       |
|----------------|--------------------|---------------------------------------------|
| EPO rs507392   | hEPO_1045F_M13     | GTAAAACGACGGCCAGTGTGGCCC<br>CAAACCATACCTG   |
|                | hEPO_1981R_M13     | CAGGAAACAGCTATGACACTGACG<br>GCTTTATCCACA    |
| EPO rs551238   | hEPO_2631F_M13     | GTAAAACGACGGCCAGTCACCCTG<br>CAAATTTGATGCC   |
|                | hEPOdown677R_M13   | CAGGAAACAGCTATGACAGTGACC<br>CATGATTGCACC    |
| EPO rs1617640  | h_EPOpro1316F_M13  | GTAAAACGACGGCCAGTAGTGCTG<br>GGATTATAGGTGTCA |
|                | h_EPOpro404_M13    | CAGGAAACAGCTATGACAGAGATG<br>CCTGGGTTGCTG    |
| M13 sequencing | M13_F              | GTAAAACGACGGCCAGT                           |
|                | M13_R              | CAGGAAACAGCTATGAC                           |

543

544

545 **Table 2 - Cycling conditions for gDNA end-point PCR.**

| <b>Step</b>                 | <b>h_EPOpro1316F_M13,<br/>h_EPOpro404R_M13</b> | <b>hEPO_1045F_M13,<br/>hEPO_1981R_M13</b> | <b>hEPO_2631F_M13,<br/>hEPOdown677R_M13</b> |
|-----------------------------|------------------------------------------------|-------------------------------------------|---------------------------------------------|
| <b>Initial Denaturation</b> | 10 min @ 95°C                                  | 10 min @ 95°C                             | 10 min @ 95°C                               |
| <b>Denaturation</b>         | 30 sec @ 95°C                                  | 30 sec @ 95°C                             | 30 sec @ 95°C                               |
| <b>Annealing</b>            | 30 sec @ 58°C                                  | 30 sec @ 58°C                             | 30 sec @ 58°C                               |
| <b>Extension</b>            | 45 sec @ 72°C                                  | 60 sec @ 72°C                             | 90 sec @ 72°C                               |
| <b>Cycles</b>               | 35                                             | 35                                        | 35                                          |
| <b>Final Extension</b>      | 10 min @ 72°C                                  | 10 min @ 72°C                             | 10 min @ 72°C                               |

546

Min=minutes, sec=seconds @=at

547

**Table 3. Demographics of the OPOS sub-cohort**

|                            | Total        | Anemia              |                    |                   | Dyslipidemia     |                    |             | Hypertension    |                    |             |
|----------------------------|--------------|---------------------|--------------------|-------------------|------------------|--------------------|-------------|-----------------|--------------------|-------------|
|                            | (n=95)       | Cases<br>(n=31)     | Controls<br>(n=64) | p-value           | Cases<br>(n=66)  | Controls<br>(n=29) | p-value     | Cases<br>(n=70) | Controls<br>(n=25) | p-value     |
| Age (years)                | 63.5 ± 6.6   | 65.1 ± 5.8          | 62.7 ± 6.8         | 0.5               | 64.3 ± 6.3       | 61.7 ± 6.8         | 0.03        | 64.2 ± 6.9      | 61.6 ± 5.3         | <b>0.04</b> |
| Females                    | 30 (32%)     | 16 (52%)            | 14 (22%)           |                   | 17 (26%)         | 13 (45%)           |             | 17 (24%)        | 13 (52%)           |             |
| BMI (kg/m <sup>2</sup> )   | 31.8 ± 7.3   | <b>34.4 ± 9.4</b>   | <b>30.5 ± 5.6</b>  | <b>0.007</b>      | 31.3 ± 6.0       | 32.7 ± 9.6         | 0.70        | 31.4 ± 6.3      | 32.8 ± 9.6         | 0.10        |
| Hemoglobin (g/L)           | 134.8 ± 14.7 | <b>117.8 ± 11.5</b> | <b>142.6 ± 7.8</b> | <b>&lt;0.0001</b> | 134.8 ± 14.6     | 135.0 ± 14.8       | 0.60        | 134.9 ± 15.2    | 134.7 ± 12.9       | 0.82        |
| Hematocrit (L/L)           | 0.40 ± 0.04  | <b>0.35 ± 0.03</b>  | <b>0.42 ± 0.02</b> | <b>&lt;0.0001</b> | 0.40 ± 0.04      | 0.40 ± 0.04        | 0.46        | 0.40 ± 0.04     | 0.40 ± 0.03        | 0.75        |
| MCV (fl)                   | 90.1 ± 4.3   | 88.2 ± 4.7          | 90.9 ± 3.8         | 0.052             | 89.4 ± 4.2       | 91.9 ± 3.9         | 0.054       | 90.3 ± 4.3      | 89.6 ± 4.2         | 0.55        |
| RBC (x10 <sup>12</sup> /L) | 4.4 ± 0.4    | <b>4.0 ± 0.4</b>    | <b>4.6 ± 0.3</b>   | <b>&lt;0.0001</b> | 4.5 ± 0.4        | 4.4 ± 0.4          | 0.81        | 4.4 ± 0.5       | 4.5 ± 0.3          | 0.53        |
| HbA1c (%)                  | 6.1 ± 1.0    | 6.2 ± 1.3           | 6.0 ± 0.9          | 0.68              | 6.2 ± 1.1        | 5.8 ± 0.8          | 0.29        | 6.1 ± 1.1       | 5.8 ± 0.8          | 0.42        |
| Cholesterol (mmol/L)       | 4.1 ± 1.2    | 4.0 ± 1.1           | 4.1 ± 1.2          | 0.86              | 3.9 ± 1.1        | 4.5 ± 1.1          | 0.06        | 3.9 ± 1.2       | 4.4 ± 1.1          | 0.52        |
| HDL (mmol/L)               | 1.2 ± 0.4    | 1.2 ± 0.4           | 1.2 ± 0.3          | 0.66              | 1.2 ± 0.3        | 1.4 ± 0.3          | 0.057       | 1.2 ± 0.4       | 1.3 ± 0.3          | 0.26        |
| LDL (mmol/L)               | 2.1 ± 0.9    | 2.1 ± 0.9           | 2.1 ± 0.9          | 0.89              | <b>2.0 ± 0.8</b> | <b>2.5 ± 1.0</b>   | <b>0.03</b> | 2.0 ± 0.9       | 2.5 ± 1.0          | 0.51        |
| LDL/HDL                    | 1.8 ± 0.8    | 1.7 ± 0.8           | 1.8 ± 0.7          | 0.63              | 1.7 ± 0.7        | 1.9 ± 0.7          | 0.38        | 1.7 ± 0.7       | 1.9 ± 0.8          | 0.92        |
| Non-HDL (mmol/L)           | 2.9 ± 1.1    | 2.8 ± 1.0           | 2.9 ± 1.1          | 0.75              | 2.7 ± 1.1        | 3.1 ± 1.0          | 0.17        | 2.8 ± 1.1       | 3.1 ± 1.0          | 0.79        |
| Triglycerides (mmol/L)     | 1.6 ± 1.1    | 1.8 ± 1.2           | 1.6 ± 1.0          | 0.58              | 1.7 ± 1.2        | 1.3 ± 0.6          | 0.27        | 1.7 ± 1.2       | 1.4 ± 0.6          | 0.59        |
| NLR                        | 3.9 ± 5.1    | 6.1 ± 8.5           | 2.9 ± 1.2          | 0.11              | 3.8 ± 4.6        | 4.1 ± 6.0          | 0.47        | 4.2 ± 5.7       | 3.1 ± 2.1          | 0.55        |

BMI=Body mass index, HDL=high-density lipoprotein, LDL=low-density lipoprotein, MCV=Mean Corpuscular Volume, RBC=red blood cells (erythrocytes), NLR=Neutrophils Lymphocytes ratio. p-value for continuous variable (BMI, Hemoglobin, Hematocrit, HbA1c, Cholesterol, HDL, LDL, MCV, Triglycerides, RBC, NLR) expressed as mean ±SD, p-value calculated using t-test. Categorical variable (Sex) expressed as number of cases (percentage of group), p-value calculated using Chi-square test. Significant p-value of <0.05 are bolded.

**Table 4. Association of anemia, dyslipidemia and hypertension by genotype**

|                  | Anemia |         |                         |             | Dyslipidemia |         |                   |              | Hypertension |         |                   |         |
|------------------|--------|---------|-------------------------|-------------|--------------|---------|-------------------|--------------|--------------|---------|-------------------|---------|
|                  | Cases  | Control | OR<br>(95%<br>CI)       | P-<br>value | Cases        | Control | OR<br>(95%<br>CI) | P-<br>value  | Cases        | Control | OR<br>(95%<br>CI) | P-value |
| <b>rs1617640</b> |        |         |                         |             |              |         |                   |              |              |         |                   |         |
| <b>AA</b>        | 8      | 30      | 2.83                    | 0.065       | 29           | 9       | 0.41              | 0.11         | 28           | 10      | 1.24              | 0.73    |
| <b>AC</b>        | 11     | 21      | (0.93-                  |             | 23           | 9       | (0.14-            |              | 24           | 8       | (0.36-            |         |
| <b>CC</b>        | 12     | 12      | 8.60)                   |             | 13           | 11      | 1.23)             |              | 18           | 6       | 4.29)             |         |
| <b>A</b>         | 27     | 81      | <b>1.96</b>             | <b>0.04</b> | 81           | 27      | 0.64              | 0.15         | 80           | 28      | 1.24              | 0.54    |
| <b>C</b>         | 35     | 45      | <b>(1.02-<br/>3.79)</b> |             | 49           | 31      | (0.34-<br>1.19)   |              | 60           | 20      | (0.62-<br>2.48)   |         |
| <b>rs507392</b>  |        |         |                         |             |              |         |                   |              |              |         |                   |         |
| <b>AA</b>        | 7      | 29      | 2.58                    | 0.12        | 28           | 8       | <b>0.29</b>       | <b>0.048</b> | 27           | 9       | 1.21              | 0.79    |
| <b>AG</b>        | 8      | 23      | (0.78-                  |             | 23           | 8       | <b>(0.09-</b>     |              | 25           | 6       | (0.29-            |         |
| <b>GG</b>        | 8      | 11      | 8.55)                   |             | 10           | 9       | <b>1.00)</b>      |              | 15           | 4       |                   |         |
| <b>A</b>         | 22     | 81      | 1.73                    | 0.12        | 79           | 24      | 0.53              | 0.066        | 79           | 24      | 1.29              | 0.51    |
| <b>G</b>         | 24     | 45      | (0.86-<br>3.46)         |             | 43           | 26      | (0.27-<br>1.05)   |              | 55           | 14      | (0.60-<br>2.81)   |         |
| <b>rs551238</b>  |        |         |                         |             |              |         |                   |              |              |         |                   |         |
| <b>TT</b>        | 8      | 32      | 2.32                    | 0.18        | 30           | 10      | 0.26              | 0.11         | 29           | 11      | 1.81              | 0.43    |
| <b>TG</b>        | 9      | 22      | (0.68-                  |             | 23           | 8       | (0.11-            |              | 24           | 7       | (0.39-            |         |
| <b>GG</b>        | 7      | 10      | 7.97)                   |             | 9            | 8       | 1.27)             |              | 14           | 3       | 8.30)             |         |
| <b>T</b>         | 25     | 86      | 1.63                    | 0.17        | 83           | 28      | 0.66              | 0.23         | 82           | 29      | 1.55              | 0.27    |
| <b>G</b>         | 23     | 42      | (0.81-<br>3.25)         |             | 41           | 24      | (0.33-<br>1.30)   |              | 52           | 13      | (0.70-<br>3.40)   |         |

OR=Odds Ratio, CI=confidence limit

**Table 5. Haplotype association**

| Haplotype          | Anemia    |                   |         | Dyslipidemia |                  |              | Hypertension |                  |         |
|--------------------|-----------|-------------------|---------|--------------|------------------|--------------|--------------|------------------|---------|
|                    | Frequency | OR (95% CI)       | p-value | Frequency    | OR (95% CI)      | p-value      | Frequency    | OR (95% CI)      | p-value |
| <b>AAT</b>         | 0.5674    | 1.00              | n/a     | 0.5673       | 1.00             | n/a          | 0.5672       | 1.00             | n/a     |
| <b>CGG</b>         | 0.3837    | 1.98 (1.01-3.91)  | 0.051   | 0.3848       | 0.72 (0.36-1.44) | 0.36         | 0.3836       | 1.45 (0.69-3.05) | 0.33    |
| <b>CGT</b>         | 0.0311    | 3.05 (0.38-24.72) | 0.3     | 0.0298       | 0.05 (0.00-0.51) | <b>0.014</b> | 0.329        | 0.39 (0.05-2.99) | 0.37    |
| <b>GHA p-value</b> |           | 0.19              |         |              | <b>0.031</b>     |              |              | 0.36             |         |

OR=Odds ratio, CI=confidence limit, GHA=global haplotype association, n/a=not applicable

**Table 6. Sex differences**

| Sex              | Gen. | Anemia |      |                   |      | Dyslipidemia |      |                   |      | Hypertension |      |                            |             |
|------------------|------|--------|------|-------------------|------|--------------|------|-------------------|------|--------------|------|----------------------------|-------------|
|                  |      | Case   | Ctrl | OR (95% CI)       | Int. | Case         | Ctrl | OR (95% CI)       | Int. | Case         | Ctrl | OR (95% CI)                | Int.        |
| <b>rs1617640</b> |      |        |      |                   |      |              |      |                   |      |              |      |                            |             |
| <b>F</b>         | A/A  | 4      | 5    | 1.00              | 0.99 | 5            | 4    | 1.00              | 0.5  | 3            | 5    | 1.00                       | 0.1         |
|                  | A/C  | 6      | 6    | 1.69 (0.25-11.25) |      | 8            | 4    | 2.19 (0.33-14.68) |      | 8            | 2    | 9.38 (0.90-98.15)          |             |
|                  | C/C  | 6      | 3    | 4.03 (0.45-35.91) |      | 4            | 5    | 0.82 (0.11-6.28)  |      | 4            | 2    | 6.48 (0.47-89.67)          |             |
| <b>M</b>         | A/A  | 4      | 25   | 1.00              |      | 24           | 5    | 1.00              |      | 24           | 5    | 1.00                       |             |
|                  | A/C  | 5      | 15   | 1.82 (0.39-8.43)  |      | 15           | 5    | 0.55 (0.13-2.33)  |      | 16           | 4    | 0.50 (0.10-2.55)           |             |
|                  | C/C  | 6      | 9    | 3.80 (0.79-18.35) |      | 9            | 6    | 0.27 (0.06-1.27)  |      | 12           | 2    | 0.54 (0.07-4.09)           |             |
| <b>rs507392</b>  |      |        |      |                   |      |              |      |                   |      |              |      |                            |             |
| <b>F</b>         | A/A  | 3      | 4    | 1.00              | 0.65 | 4            | 3    | 1.00              | 0.65 | 2            | 5    | 1.00                       | <b>0.03</b> |
|                  | A/G  | 3      | 7    | 0.73 (0.08-6.54)  |      | 7            | 3    | 1.88 (0.21-16.79) |      | 8            | 2    | <b>18.48 (1.50-227.27)</b> |             |
|                  | G/G  | 4      | 3    | 3.55 (0.31-40.81) |      | 3            | 4    | 0.43 (0.04-5.13)  |      | 5            | 2    | <b>15.43 (1.02-233.40)</b> |             |
| <b>M</b>         | A/G  | 4      | 25   | 1.00              |      | 24           | 5    | 1.00              |      | 25           | 4    | 1.00                       |             |
|                  | G/G  | 5      | 16   | 1.89 (0.41-8.82)  |      | 16           | 5    | 0.55 (0.13-2.33)  |      | 17           | 4    | 0.51 (0.10-2.63)           |             |
|                  | C/C  | 4      | 8    | 2.78 (0.51-15.09) |      | 7            | 5    | 0.21 (0.04-1.11)  |      | 10           | 2    | 0.45 (0.06-3.49)           |             |
| <b>rs551238</b>  |      |        |      |                   |      |              |      |                   |      |              |      |                            |             |
| <b>F</b>         | T/T  | 4      | 4    | 1.00              | 0.57 | 4            | 4    | 1.00              | 0.42 | 2            | 6    | 1.00                       | <b>0.02</b> |
|                  | T/G  | 4      | 7    | 0.59 (0.08-4.36)  |      | 8            | 3    | 3.22 (0.40-25.64) |      | 9            | 2    | <b>19.16 (1.84-199.49)</b> |             |
|                  | G/G  | 3      | 3    | 1.80 (0.17-19.69) |      | 2            | 4    | 0.55 (0.05-6.61)  |      | 4            | 2    | 11.33 (0.84-153.49)        |             |
| <b>M</b>         | T/T  | 4      | 28   | 1.00              |      | 26           | 6    | 1.00              |      | 27           | 5    | 1.00                       |             |
|                  | T/G  | 5      | 15   | 2.26 (0.48-10.58) |      | 15           | 5    | 0.62 (0.15-2.52)  |      | 15           | 5    | 0.47 (0.11-2.06)           |             |
|                  | G/G  | 4      | 7    | 3.40 (0.61-18.82) |      | 7            | 4    | 0.32 (0.06-1.72)  |      | 10           | 1    | 1.11 (0.10-12.27)          |             |

F=female, M=male, Geno=Genotype, Ctrl=Control, OR=odds ratio, Int=Interaction p-value, CI=confidence limit

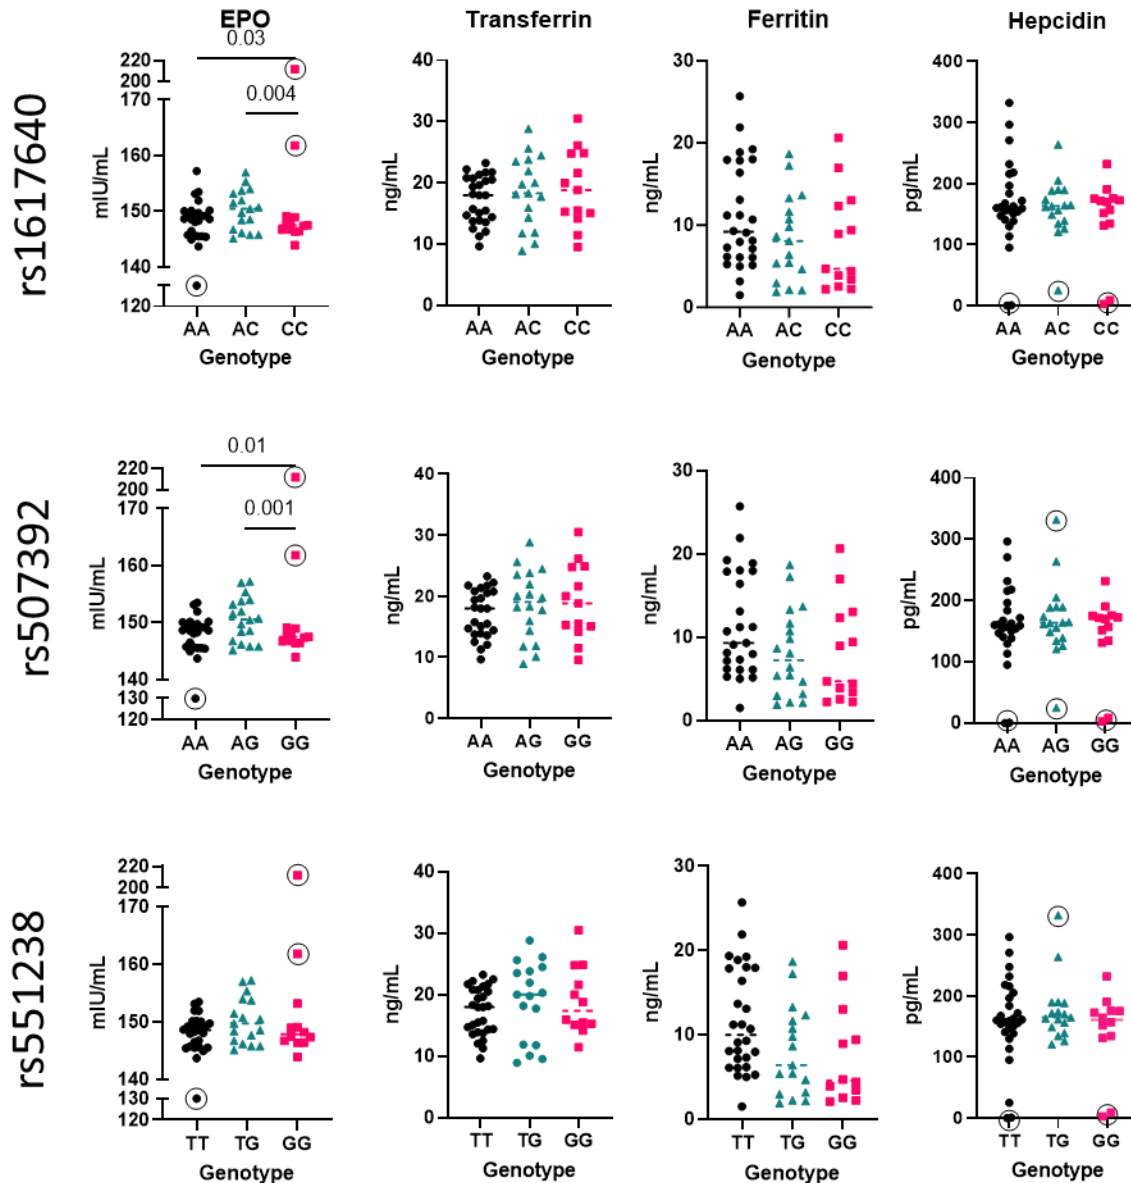

**Figure 1. Plasma EPO concentration is decreased in rs161640 CC genotype and rs507392 GG genotype, but not rs51238.** Transferrin and Hepcidin showed no genotype correlation although there does appear to be variation in Ferritin it does not reach significance. Plasma concentrations were determined using ELISA assays with outliers marked by circles and excluded from statistical analysis. Outliers were determined by ROUT test and *a priori* as two standard deviations from the mean or else being below the lower limit of detection of the ELISA. ANOVA was used to determine significance with p-values < 0.05 deemed significant.
